# Supplementary material for: Micropropagation of Seed-Derived Clonal Lines of the Endangered Agave marmorata Roezl and Their Compatibility with Endophytes
Source: MDPI journal article supplement (doi:10.3390/biology11101423), 2022-09-29
Supplement: s1 [file s1]

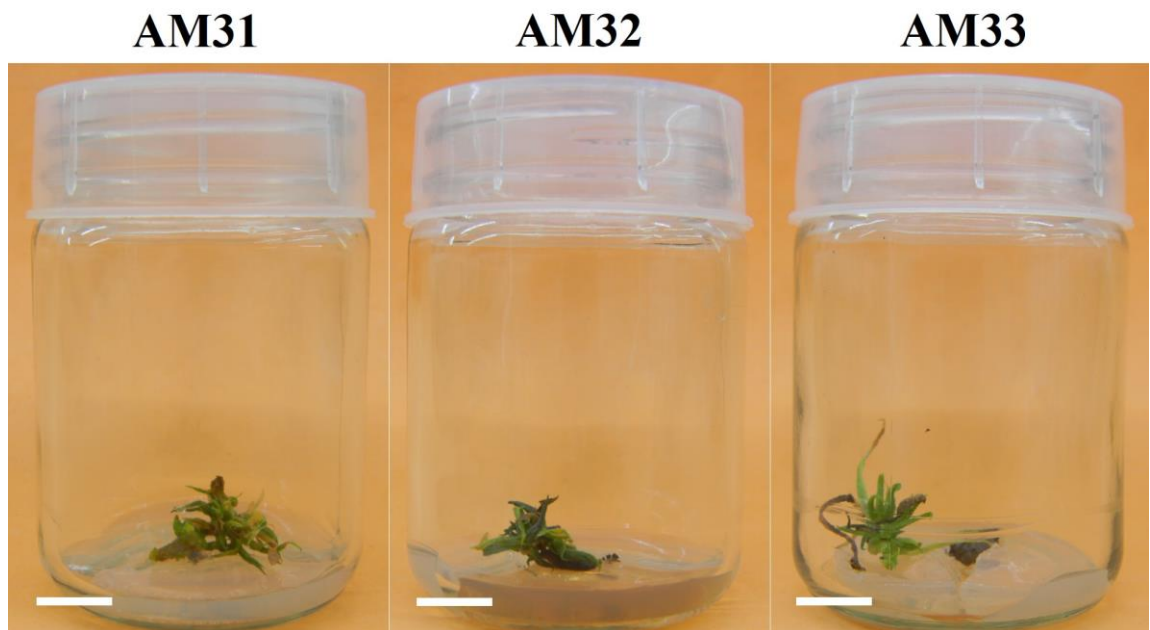

**Supplementary Figure S1.** Seedlings of the all-clonal lines in MS medium without BAP did not multiply shoots. Seedlings developed an attempt to form a mature plant a “mature plant” that did not grow in AM31, AM32, and AM33 selected lines. Bars= 1 cm.
